# Supplementary material for: Simulating photoacoustic waves produced by individual biological particles with spheroidal wave functions
Source: PubMed Central journal article supplement (PMC4595827; doi:10.1038/srep14801), 2015-10-07
Supplement: srep14801-s1.pdf [file srep14801-s1.pdf]

## **Supplementary Figures for**

### **Simulating photoacoustic waves produced by individual biological particles with spheroidal wave functions**

Yong Li<sup>1</sup>, Hui Fang<sup>2,\*</sup>, Changjun Min<sup>2</sup>, and Xiaocong Yuan<sup>2</sup>

<sup>1</sup>Institute of Modern Optics, Key Laboratory of Optical Information Science and Technology, Ministry of Education of China, College of Electronic Information and Optical Engineering, Nankai University, Tianjin 300071, China

<sup>2</sup>Institute of Micro and Nano Optics, Key Laboratory of Optoelectronic Devices and Systems of Ministry of Education and Guangdong Province, College of Optoelectronic Engineering, Shenzhen University, Shenzhen 518060, China

\*fhui79@szu.edu.cn

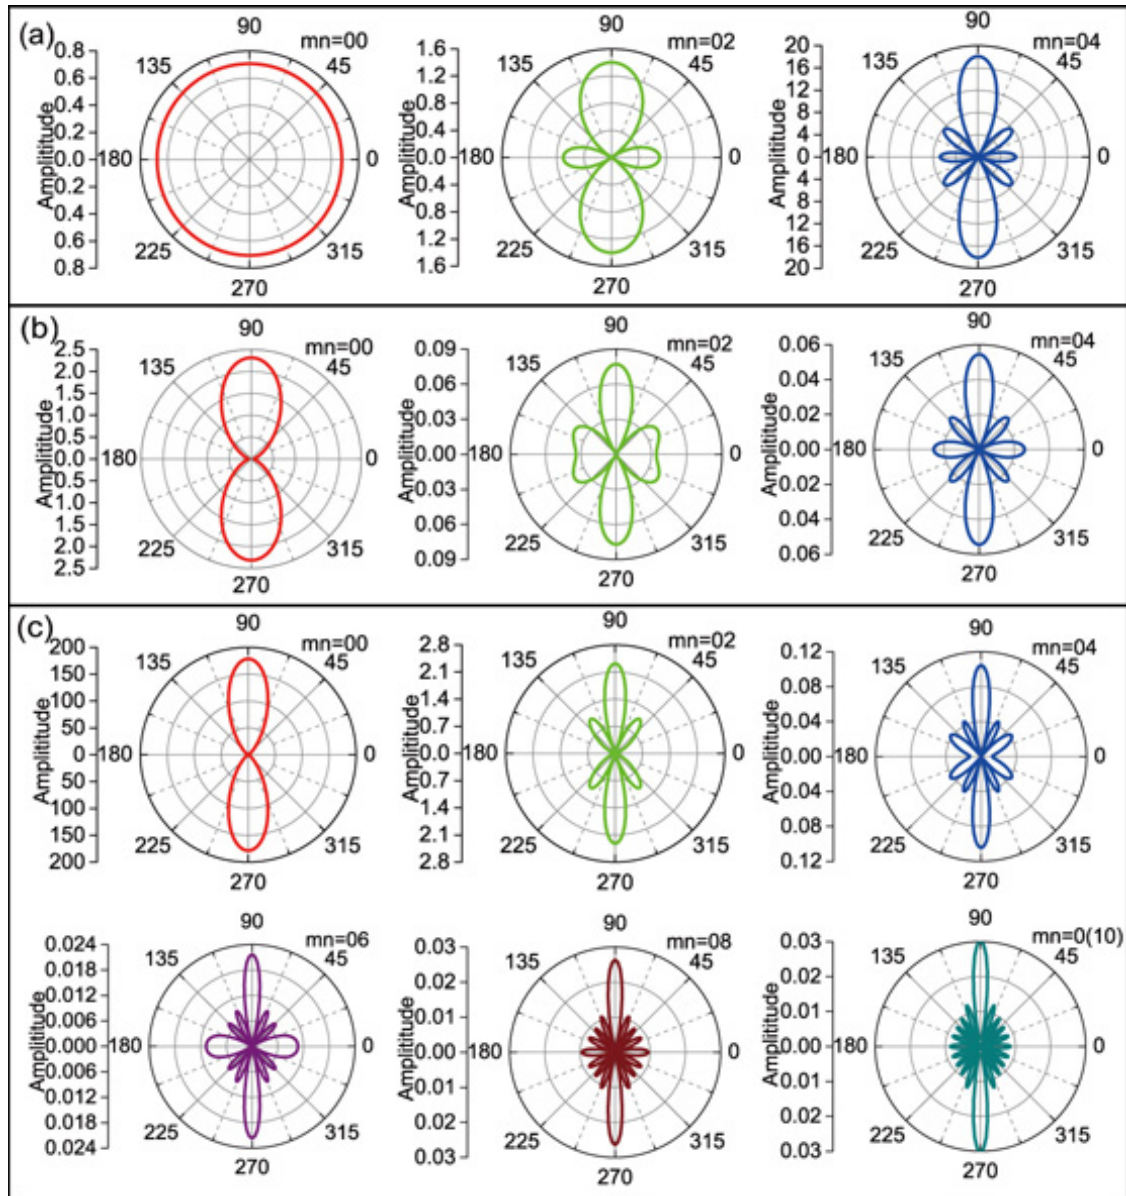

Fig. S1 The polar distribution patterns for a few lowest modes angular SWFs of oblate spheroids at three typical frequencies corresponding to  $c_f = 0.5, 5.0, 10.0$ . These results can be compared to the standard values listed in [1, 2].

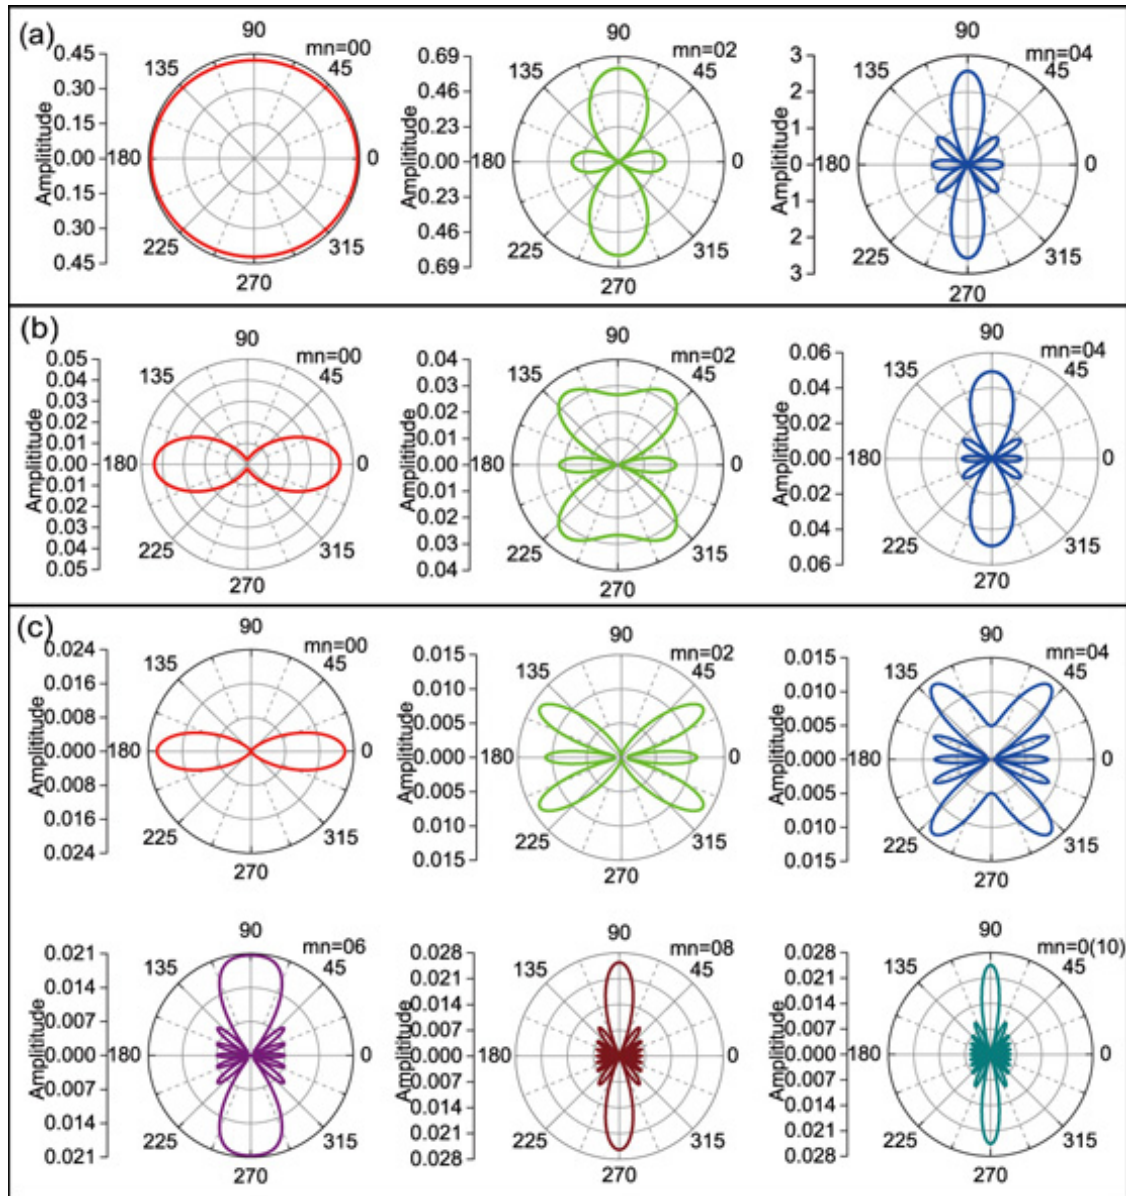

Fig. S2 The polar distribution patterns for a few lowest modes angular SWFs of prolate spheroids at three typical frequencies corresponding to  $c_f = 0.5, 5.0, 10.0$ . These results can be compared to the standard values listed in [1, 2].

## References

- [1] C. Flammer. *Spheroidal Wave Functions* (Stanford University Press, Stanford, CA, 1957).
- [2] S. Zhang, and J. Jin. *Computation of Special Functions* (Wiley, New York, 1997).
